# Supplementary material for: The new FreeStyle libre flash glucose monitoring system improves the glycaemic control in a cohort of people with type 1 diabetes followed in real‐life conditions over a period of one year
Source: PubMed Central journal article supplement — Endocrinol Diabetes Metab. 2018 Jun 17;1(3):e00023. doi: 10.1002/edm2.23 (PMC6354746; doi:10.1002/edm2.23), 2018-06-17
Supplement: EDM2-1-e00023-s001.pdf [file EDM2-1-e00023-s001.pdf]

All participants

Individuals with HbA1c  $\geq 7.5$  at T0

Individuals with HbA1c  $< 7.5$  at T0

T0

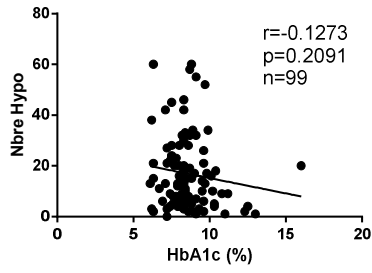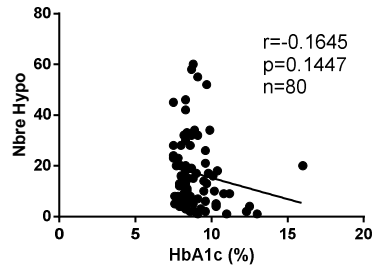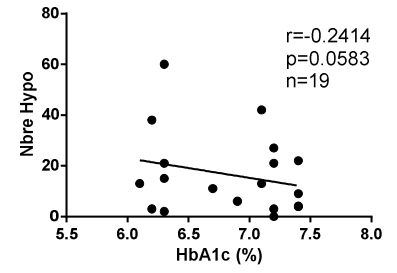

T3

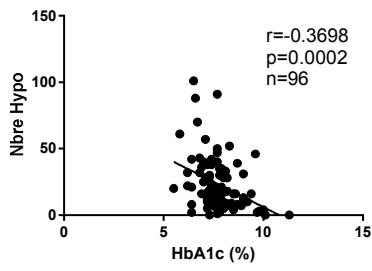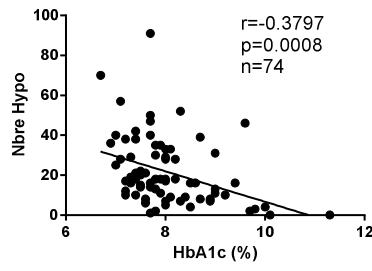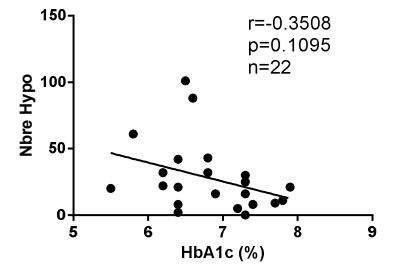

T6

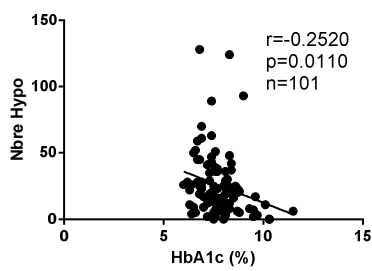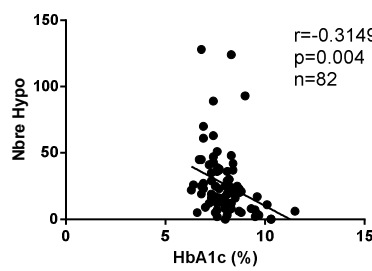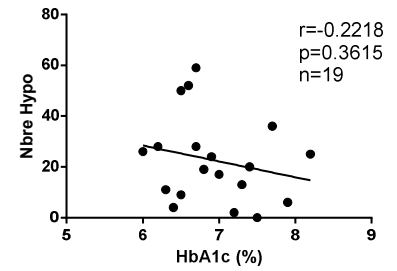

T9

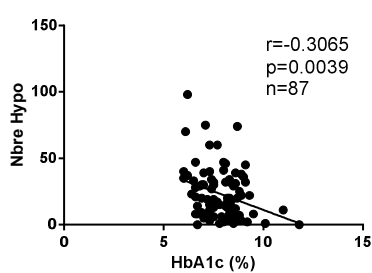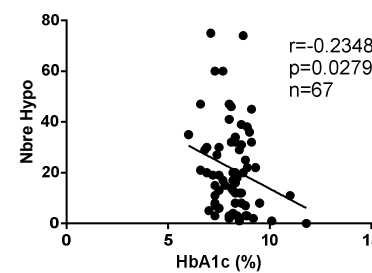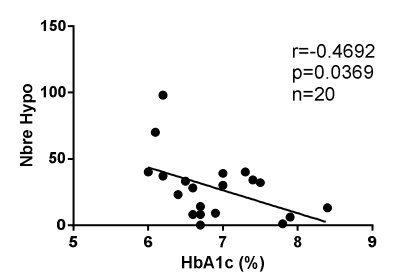

T12

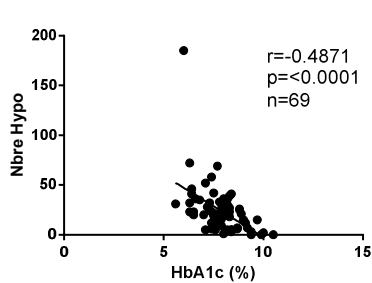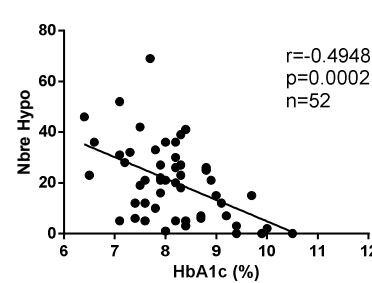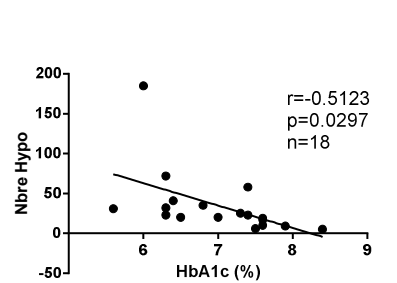

Supplemental Fig.1
